# Supplementary material
Source: PubMed Central journal article supplement (PMC327203)

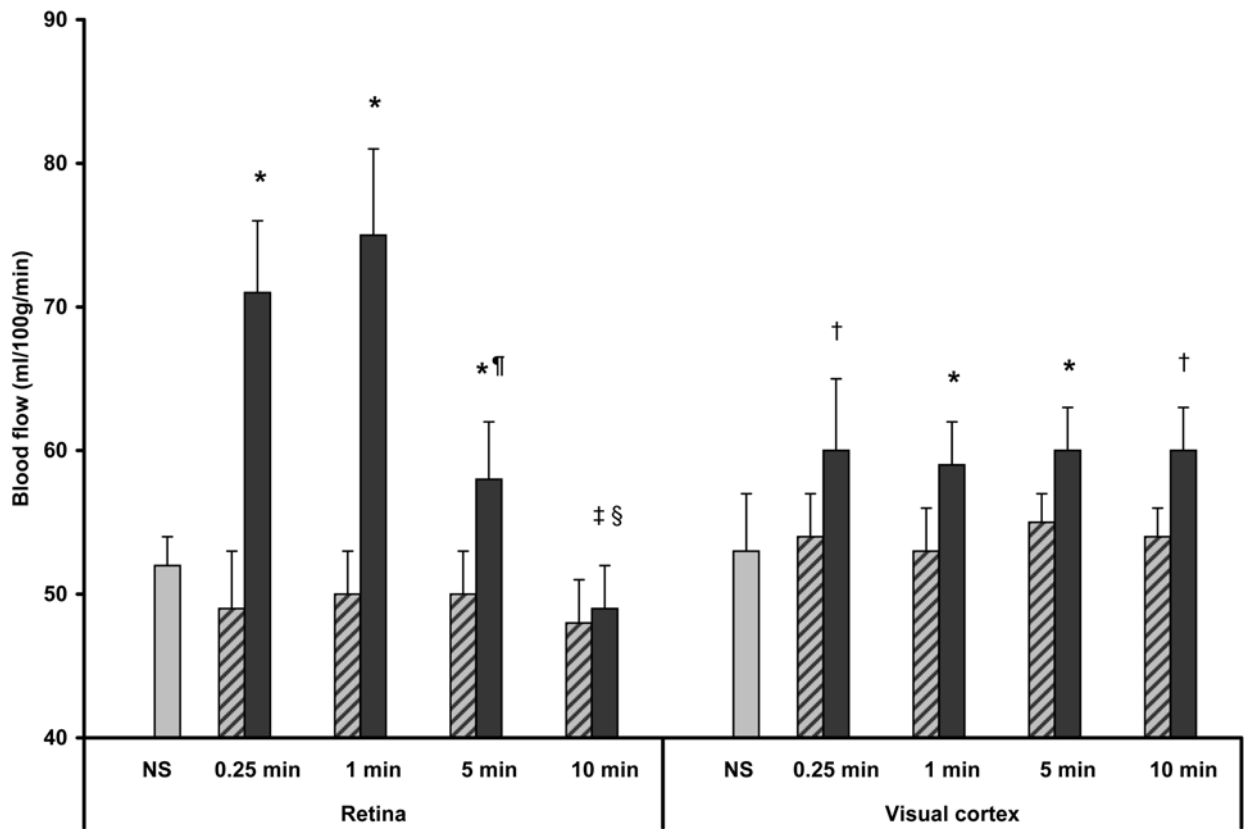

Supplement: pnas_0307458100_2.pdf [file pnas_0307458100_2.pdf]
